1 **Octapeptin C4 Induces Less Resistance and Novel Mutations in an Epidemic**  
2 **Carbapenemase-producing *Klebsiella pneumoniae* ST258 Clinical Isolate**  
3 **Compared to Polymyxins**

4  
5 **Miranda E. Pitt<sup>a</sup>, Minh Duc Cao<sup>a</sup>, Mark S. Butler<sup>a</sup>, Soumya Ramu<sup>a</sup>, Devika**  
6 **Ganesamoorthy<sup>a</sup>, Mark A. T. Blaskovich<sup>a</sup>, Lachlan J. M. Coin<sup>a#</sup> and Matthew A. Cooper<sup>a#</sup>**

7 <sup>a</sup>Institute for Molecular Bioscience, The University of Queensland, Brisbane, Australia

8

9 Running Title: Induced Polymyxin and Octapeptin C4 Resistance

10

11

12 # Address correspondence to authors: Matthew Cooper ([m.cooper@uq.edu.au](mailto:m.cooper@uq.edu.au)) & Lachlan Coin

13 ([l.coin@imb.uq.edu.au](mailto:l.coin@imb.uq.edu.au))

14 **ABSTRACT**

15 Polymyxin B and E (colistin) have been pivotal in the treatment of extensively drug-resistant  
16 (XDR) Gram-negative bacterial infections, with increasing use over the past decade.  
17 Unfortunately, resistance to these antibiotics is rapidly emerging. The structurally-related  
18 octapeptin C4 (OctC4) has shown significant potency against XDR bacteria, including against  
19 polymyxin-resistant (Pmx-R) strains, but its mode of action remains undefined. We sought to  
20 compare and contrast the acquisition of XDR *Klebsiella pneumoniae* (ST258) resistance *in vitro*  
21 with all three lipopeptides to help elucidate the mode of action of the drugs and potential  
22 mechanisms of resistance evolution. Strikingly, 20 days of exposure to the polymyxins resulted in  
23 a dramatic (1000-fold) increase in the minimum inhibitory concentration (MIC) for the  
24 polymyxins, reflecting the evolution of resistance seen in clinical isolates, whereas for OctC4 only  
25 a 4-fold increase was witnessed. There was no cross-resistance observed between the polymyxin-  
26 and octapeptin-induced resistant strains. Sequencing revealed previously known gene alterations  
27 for polymyxin resistance, including *crrB*, *mgrB*, *pmrB*, *phoPQ* and *yciM*, and novel mutations in  
28 *qseC*. In contrast, mutations in *mldDF* and *pqiB*, genes related to phospholipid transport, were  
29 found in octapeptin-resistant isolates. Mutation effects were validated via complementation assays.  
30 These genetic variations were reflected in phenotypic changes to lipid A. Pmx-R isolates increased  
31 4-amino-4-deoxy-arabinose fortification to phosphate groups of lipid A, whereas OctC4 induced  
32 strains harbored a higher abundance of hydroxymyristate and palmitoylate. The results reveal a  
33 differing mode of action compared to polymyxins which provides hope for future therapeutics to  
34 combat the increasingly threat of XDR bacteria.

35 **Keywords:** Polymyxins, Octapeptin C4, Extensively drug-resistant, *Klebsiella pneumoniae*, Lipid  
36 A, Cross-resistance

## 37 INTRODUCTION

38 Infections by extensively drug-resistant (XDR) bacteria are an increasing concern due to the lack  
39 of effective antibiotics, thereby resulting in high mortality (1, 2). Common therapeutic  
40 interventions include fosfomycin, tigecycline and polymyxins (2-4). However, the effectiveness  
41 of these therapies is short lived due to plasmid-encoded resistance (fosfomycin (4), polymyxin (5))  
42 and rapid acquisition of resistance through mutation (fosfomycin (6), tigecycline (7) and  
43 polymyxin (8, 9)). New antibiotics with the capacity to ablate these XDR bacteria are urgently  
44 desired.

45 Octapeptins are structurally similar to the polymyxins, with both lipopeptide classes consisting of  
46 a cyclic heptapeptide ring and linear tail capped with a fatty acid, containing multiple positively  
47 charged diaminobutyric acid (Dab) residues (10-12) (Fig. 1). Studies on the polymyxins have  
48 shown that these Dab residues are critical for interactions with the basal component of  
49 lipopolysaccharide (LPS), lipid A. The mode of action involves the initial binding to lipid A,  
50 displacement of magnesium ( $Mg^{2+}$ ) and calcium ( $Ca^{2+}$ ), permeabilization of the outer and inner  
51 membrane, leakage of cytoplasmic contents and subsequent cell death, however, the exact  
52 mechanism is yet to be discerned (13, 14). The phosphate groups on lipid A are modified during  
53 polymyxin resistance with 4-amino-4-deoxy-arabinose (Ara4N) and/ or phosphoethanolamine  
54 (pEtN) in order to stabilise the outer membrane. This reduces polymyxin binding by removing the  
55 negative phosphate that attracts the cationic Dab residues (15, 16). Constitutive up-regulation of  
56 this pathway is achieved through chromosomal variations in the two-component regulatory  
57 systems (TCS) *crrAB*, *pmrAB*, *phoPQ* and the negative regulator *mgrB* in *Klebsiella pneumoniae*  
58 (8, 9, 17). These modifications perturb the electrostatic interaction between lipid A and  
59 polymyxins to negate the infiltration of this antibiotic class. The structurally similar octapeptins

60 retain most of the key binding motifs, and might be expected to employ a similar mode of action.  
61 The most significant structural difference between the polymyxins and octapeptins is a truncated  
62 linear exocyclic peptide (1 residue instead of three) linked to a  $\beta$ -hydroxy-fatty acid (instead of an  
63 alkyl fatty acid) in the octapeptins (10-12). More minor variations include L-Dab to D-Dab and L-  
64 Thr to L-Leu substitutions. Loss of the fatty acid tail component has been shown to attenuate  
65 activity in polymyxins (18). Despite their similarity, prior research has revealed octapeptins retain  
66 the ability to kill Pmx-R bacteria, inferring an alternative mode of action (10). In addition, some  
67 octapeptins have broad spectrum activity with potency against Gram-positive bacteria, fungi and  
68 protozoa (19, 20).

69 We have recently reported the first synthesis of Octapeptin C4 (OctC4) (10) and Octapeptin A3  
70 (21), followed by detailed biological characterisation of OctC4 that demonstrates its potential as a  
71 new ‘last resort’ antibiotic to treat serious extensively drug-resistant Gram-negative infections.  
72 (22). In view of the limited understanding of the mechanism by which octapeptins target bacteria,  
73 we sort to investigate the differences driving development of OctC4 and polymyxin resistance at  
74 a genetic level. Two studies have previously investigated the acquisition of resistance towards  
75 octapeptins. One was performed using EM49 (a mixture of octapeptin classes A and B) which  
76 exhibited no increase in resistance after 10 passages for *Pseudomonas aeruginosa*, *Escherichia*  
77 *coli*, *Staphylococcus aureus* and *Candida albicans* (23). The other investigated lipid A  
78 modifications in *P. aeruginosa* isolates resistant to OctC4 obtained from a subculture surviving a  
79 single overnight treatment at 2 or 32  $\mu\text{g/ml}$ .

80

81

82

83 The ST258 lineage of *K. pneumoniae* is endemic in numerous regions in the world and commonly  
84 involved in outbreaks (24-27). These isolates pose as a major threat due to frequently harboring  
85 carbapenem resistance, predominantly facilitated via *blaKPC* genes encoded on plasmids (25, 28).  
86 We have previously used whole genome sequencing to investigate the acquisition of resistance to  
87 polymyxin in an endemic lineage of *K. pneumoniae*, ST258, isolated from a Greek hospital (24).  
88 We selected one of these isolates which is susceptible to polymyxin and OctC4, but otherwise  
89 highly resistant (*aac(6')Ib*, *aac(6')Ib-cr*, *aph(3')-Ia*, *aph(3'')-Ib*, *aph(6)-Id*, *blaKPC-2*, *blaLEN-*  
90 *12*, *blaOXA-9*, *blaTEM-1B*, *fosA*, *oqxAB*, *sul2*, *tet(A)*, *dfrA14* positive), for resistance induction  
91 experiments. This strain is representative of the type of pathogens for which a 'last resort'  
92 antibiotic is employed, and one where high levels of clinical resistance to polymyxins have already  
93 been well characterised at a genetic level (24). The resistance induction experiments were followed  
94 by characterization of antibiotic susceptibility, whole genome sequencing, and analysis of lipid A  
95 composition. This research has uncovered significant differences in the development of resistance  
96 induced by the two classes of antibiotics, both in the level of resistance created and in the  
97 underlying genetic mutations. The results provide strong support for further development of the  
98 octapeptins as potential last-resort therapeutics.

## 99 RESULTS

100 **Rapid resistance acquisition for polymyxins dissimilar to OctC4.** Forced evolution on XDR *K.*  
101 *pneumoniae* was monitored over a 20 day time course, with six replicates exposed to increasing  
102 concentrations of either polymyxin B (PMB), polymyxin E (colistin, CST) and OctC4. Significant  
103 variability was observed between polymyxins and OctC4 (Fig. 2D). Initially, an MIC of 0.125  
104  $\mu\text{g/ml}$  was measured for both CST and PMB. The majority of replicates treated with the  
105 polymyxins had a clinical resistance phenotype of  $>2 \mu\text{g/ml}$  by day 10 (Fig. 2A and B). At some  
106 point, every replicate had a dramatic and rapid escalation in MIC to  $>64 \mu\text{g/ml}$ , generally over  $\leq 5$   
107 days. The timing for the drastic increase varied between replicates, and appeared dependent on  
108 whether the replicate could tolerate  $0.5 \mu\text{g/ml}$ , with a steep escalation from the day that resistance  
109 level was exceeded. In sharp contrast, OctC4 resistance progressed steadily over the 20 days (Fig.  
110 2C) with only a 4-fold (initial MIC:  $8 \mu\text{g/ml}$ ) overall increase compared to a  $\geq 1000$ -fold increase  
111 for the polymyxins (Fig. 2E). The trend for a gradual increase in OctC4 resistance was consistent  
112 amongst replicates. The induced resistance appeared to be stable after five additional passages  
113 without antibiotic exposure for polymyxins. The extent of growth in wells containing either 32 or  
114  $16 \mu\text{g/ml}$  started to diminish for OctC4-induced isolates during the last passages.

115 **Lack of cross-reactivity and reduction of resistance in OctC4 induced isolates.** Day 20 isolate  
116 MICs were determined against a broad array of antibiotic classes to evaluate if acquired resistance  
117 conferred cross-resistance, or resulted in regained susceptibility (Table 1). Remarkably, no cross-  
118 reactivity was apparent between polymyxins and OctC4. Non-susceptibility towards amoxicillin,  
119 aztreonam, ceftriaxone, ciprofloxacin, piperacillin and trimethoprim was ubiquitous amongst  
120 treatment groups. Chloramphenicol resistance was observed in the initial isolate but was  
121 diminished in the majority of replicates over the time course for all three antibiotics. In some

122 instances, cefepime susceptibility was restored (replicates OctC4\_3, OctC4\_4 and OctC4\_6).  
123 These replicates also regained susceptibility to meropenem, as did PMB\_2. Replicate OctC4\_2  
124 also exhibited susceptibility to tetracycline and tigecycline whilst this profile for OctC4\_4 varied  
125 extensively for these antibiotics, where resistant and susceptible MICs were recorded depending  
126 on the colonies selected.

127 **Octapeptin resistance induced isolates harbor an increase in hydroxymyristate and**  
128 **palmitoylate dissimilar to Ara4N lipid A modifications in Pmx-R strains.** In the initial isolate,  
129 MS/MS analysis of extracted lipid A fractions showed that the major singly charged peak was  $m/z$   
130 1824.2, which corresponded to a hexa-acylated lipid A species comprised of two phosphate  
131 groups, two glucosamines and four 3-hydroxy-myristoyl groups (3-OH-C<sub>14</sub>), with two of these  
132 further acylated with myristate (C<sub>14</sub>) (Fig. 3A, also see Fig. S1 in the supplemental material). Due  
133 to the low intensity of this peak and the maximum detection limit of 2000 Da, in the system used,  
134 doubly charged masses were examined (see Fig. S1A in the supplemental material). This mass  
135 correlated to a doubly charged species of  $m/z$  911.6 herein designated as the wild-type (WT) lipid  
136 A. Lesser quantities of various modifications accompanied the WT lipid A in the initial strain,  
137 including a hydroxyl modification of a myristate ( $m/z$  919.6, WT+C<sub>14:OH</sub>), palmitoylation ( $m/z$   
138 1030.7 WT+C<sub>16</sub>) and even the addition of Ara4N ( $m/z$  977.1, WT+Ara4N), a modification known  
139 to confer polymyxin resistance (Fig. 3B). In sharp contrast, the predominant species found in Pmx-  
140 R isolates was the near complete loss of WT lipid A and fortification of Ara4N on phosphate  
141 groups, mainly in hydroxymyristate species ( $m/z$  985.1, WT+C<sub>14:OH</sub>+Ara4N;  $m/z$  1042.7,  
142 WT+2(Ara4N);  $m/z$  1050.7, WT+C<sub>14:OH</sub>+2(Ara4N)) (Fig. 3B, see Fig. S2 and S3 in the  
143 supplemental material). These changes corresponded to the genetic changes described in the  
144 following sections. The other commonly reported lipid A modification for resistance, pEtN,

145 corresponding to *m/z* 973.2 was never observed. The lipid A from the OctC4 induced isolates was  
146 substantially different from the Pmx-R isolates and similar to the WT profile, with a major peak  
147 of the hydroxymyristate derivative and a significant 5-fold increase in representation of  
148 palmitoylation (Fig. 3B, see Fig. S4 in the supplemental material). The Ara4N modification was  
149 enhanced compared to WT, but not to the extent seen with Pmx-R isolates.

150 **Plasmid loss associated with OctC4 resistance.** To ascertain the genetic basis for resistance and  
151 subsequent phenotypic traits, four day 20 replicates were selected from each treatment group.  
152 Clonal expansion of genomic variations were monitored by selecting four colonies per replicate.  
153 Additionally, two colonies from the initial isolate were sequenced. The initial isolate harbored  
154 multiple acquired resistance genes targeting aminoglycosides,  $\beta$ -lactams, fosfomycin, quinolones,  
155 sulfonamides, tetracycline and trimethoprim, consistent with the parent XDR profile (Table 2).  
156 Five plasmid replicons were identified including ColRNAI, IncFIB(K)-Kpn3, IncFII(K), IncN and  
157 IncX3. In cross-resistance studies, the only Pmx-R replicate with an alteration in MIC profile to  
158 other antibiotics was PMB\_2. Unique to PMB\_2 was the susceptibility to meropenem and a  
159 reduction in resistance towards cefepime. Sequencing revealed a lack of *aph(3')-Ia*, *blaKPC-2*,  
160 *blaOXA-9* and no evidence of the IncX3 replicon in all four colonies. There was also a partial loss  
161 of this plasmid in PMB\_4 (Table 2).

162 High variability of acquired resistance genes and plasmids were witnessed for OctC4 exposed  
163 replicates. Resistance genes impacted included *aph(3')-Ia*, *aph(3'')-Ib*, *aph(6)-Id*, *blaKPC-2*,  
164 *blaOXA-9*, *blaTEM-1B*, *sul2*, *tet(A)* and *dfrA14*. Furthermore, plasmid replicon loss was apparent  
165 in three of the four replicates including IncFIB(K)-Kpn3, IncFII(K) and IncN. Subtle discrepancies  
166 in  $\beta$ -lactamase genes were observed across the three treatment groups; however, this was attributed  
167 to difficulties in the assembly due to high homology amongst these genes.



168 **Chromosomal variations in lipopolysaccharide pathways associated with polymyxin**  
169 **resistance whilst phospholipid transport associated with OctC4 resistance.** Genomic  
170 alterations identified in polymyxin and OctC4 treated replicates differed significantly. In Pmx-R  
171 replicates, genes predominantly associated with LPS processing and lipid A modifications were  
172 altered, including *crrB*, *hepIII*, *lptC*, *mgrB*, *pmrB*, *phoPQ* and *yciM* (Table 3). An additional TCS  
173 gene, *qseC*, was also disrupted in PMB\_3 (S8R, I283L) and PMB\_4 (L40F). Although similar  
174 genes were impacted across replicates, the mutation positions differed. Additionally, an  
175 accumulation of variations in LPS pathways were apparent within a single replicate. All four  
176 colonies from a single replicate were commonly changed indicating clonal expansion of this  
177 variant. Complementation assays were further conducted to unveil the contributions of these genes  
178 to observed resistance (Fig. 4). Polymyxin susceptibility was restored in CST\_2 (complete deletion  
179 of *mgrB*), CST\_3 (M1I), CST\_4 (N42I), PMB\_2 (W47L) and PMB\_4 (D29Y) once complemented  
180 with pTOPO-*mgrB* (Fig. 4B-D, F and H). The PmrB (P95L) variant in PMB\_1 was validated to  
181 contribute to resistance (Fig. 4E). Alterations in CrrB (D57V), PhoP (R81C) and QseC (S8R,  
182 I283L) were confirmed to cause resistance once these genes were introduced into the initial strain  
183 (Fig. 4M). Subtle increases in polymyxin MIC was detected for PhoQ (P420A, G434C), PhoQ  
184 (D417N) and QseC (L40F) but did not surpass the breakpoint (Fig. 4M). This confirms the  
185 presence of multiple resistance conferring mutations being present in a single isolate and several  
186 contributing to the elevation of MIC.

187 The OctC4 replicates harbored changes in *mldDF*, *pqiB* and *traH* in all four colonies. Additional  
188 genes altered that were apparent in two colonies per replicate included *azoR*, *hinT* and *rpsA*.  
189 Strikingly, *mldF* (A165P) was impacted in three different OctC4 replicates at the same position  
190 (Table 3). Complementation assays that introduced pTOPO-*mldD*, -*mldF* or -*pqiB* into OctC4

191 induced replicates reduced the MIC by 2-fold, however, consistently only partial growth was  
192 observed at 8 µg/ml. This finding validates the partial contribution of these genes to resistance  
193 (Fig. 4I-L). Introduction of WT genes into the initial isolate revealed that the vector and gene did  
194 not influence the MIC and confirmed that these alterations are responsible for the resistance  
195 observed (Fig. 4M and N).

196 **DISCUSSION**

197 Polymyxin unfortunately now induce high levels of resistance during therapeutic use, which is  
198 further compromised by suboptimal exposure in the clinic due to the risk of nephrotoxicity (29).  
199 Resistance in *K. pneumoniae* appears to be stable and incurs a minimal fitness cost (30, 31). These  
200 clinical characteristics were reflected in our study whereby once the isolate could tolerate 0.5  
201 µg/ml of either CST or PMB, the clinical breakpoint was vastly exceeded within 48 h, well within  
202 the duration of clinical antibiotic therapy. This rapid induction of resistance was not observed for  
203 OctC4, in which only comparatively minor increases in MIC were observed. The slow progression  
204 in resistance profile could be an advantageous characteristic of OctC4 as a potential clinical  
205 intervention.

206 Following 20 days of increasing sub-lethal antibiotic exposure, no cross-resistance was apparent  
207 between polymyxins and OctC4. CST and PMB resulted in similar profiles with the only deviation  
208 seen in sample PMB\_2 in which susceptibility to meropenem was regained. This is due to the  
209 absence of *blaKPC-2* and *blaOXA-9*. Additionally, the homogenous loss of the IncX3 plasmid was  
210 identified. Clinically, meropenem is being used in combination with polymyxins, and these results  
211 suggest that, in some cases, meropenem may overcome polymyxin resistance (32, 33).  
212 Furthermore, previous research has identified the loss of *blaKPC* plasmids in Pmx-R clinical  
213 isolates and suggests that this loss is due to a potential fitness cost (34). Our results show various  
214 accounts of plasmid loss in OctC4-exposed replicates, and this corresponded to a reduction in  
215 resistance towards cefepime, meropenem and tetracycline. Whether this resembles a fitness cost  
216 associated with OctC4 exposure or due to repeated passaging under no selective pressure for the  
217 genes harbored on these plasmids warrants further investigation.

218 Interestingly, resistance towards chloramphenicol was diminished in polymyxin and OctC4  
219 exposed strains. Resistance towards chloramphenicol can arise from plasmid-encoded  
220 chloramphenicol acetyltransferases, alterations in the target 50S ribosomal subunit, or disruptions  
221 in porins and efflux pumps (35). The absence of acquired resistance genes and the lack of  
222 modifications in these regions may imply either a down-regulation of efflux pumps or an  
223 alternative resistance mechanism. The synergistic mechanism of polymyxins and chloramphenicol  
224 have been extensively studied; however, this finding potentially indicates a novel loss of  
225 chloramphenicol resistance upon gaining resistance towards these lipopeptides (36, 37), and is also  
226 seen with the octapeptins.

227 The mutations observed in polymyxin resistance induced ST258 strains can be compared to those  
228 we have previously identified in closely related polymyxin-resistant clinical ST258 isolates,  
229 2\_GR\_12, 4\_GR\_12, 10\_GR\_13, 13\_GR\_14 and 14\_GR\_14 (24). As in this study, the vast  
230 majority of resistance was attributed to *mgrB* (60%), albeit not via an IS element disruption  
231 commonly observed in the clinic. Additional mutations were also identified in *phoPQ*  
232 accompanying the *mgrB* disruption, which was also apparent in this study (CST\_3, CST\_4,  
233 PMB\_2). Other mutations in *crrB*, *mgrB*, *pmrB*, *phoPQ* and *yciM* in acquisition of polymyxin  
234 resistance have previously been described in resistant strains (16, 17, 38). Taken together, this  
235 indicates that resistance induction experiments have the capacity to induce genomic changes  
236 observed in the clinic.

237 These mutations lead to increased levels of Ara4N–modified lipid A, as observed in the lipid A  
238 analysis. Interestingly, the initial polymyxin-susceptible isolate exhibited Ara4N lipid A  
239 modifications which reveals a heteroresistant strain where a subpopulation of resistant bacteria  
240 exists within a phenotypically susceptible isolate. In several instances for polymyxin induced

241 isolates, mutations were present in multiple genes within a replicate. CST\_3 harbored a deleterious  
242 mutation in *mgrB* (M1I) and additional alterations in *phoQ* (P420A, G434C) increased tolerance  
243 to CST. This was also the circumstance for CST\_4 (*mgrB*: N42I, *phoQ*: D417N). PMB\_2  
244 possessed a resistance conferring mutation in *mgrB* (W47L) and *phoP* (R81C). The notion that  
245 one alteration in TCS drives resistance, the circumstance for the majority of clinical isolates is well  
246 accepted (39). However, our findings contradict this concept.

247 We also identified alterations in another TCS, QseBC, which is known to facilitate cross-talk with  
248 PmrAB in *Escherichia coli* (40). In *E. coli*, PmrB acts as a noncognate partner to the QseBC TCS  
249 and has the capability to not only phosphorylate PmrA, but also QseB. The absence of QseC was  
250 shown to impact virulence due to the accumulation of phosphorylated QseB and in particular,  
251 alterations in the histidine kinase domain attenuates its ability to de-phosphorylate QseB (40, 41).  
252 Furthermore, the deletion of *qseC* and *pmrA*, promoting phosphorylation of QseB by PmrB,  
253 stimulated tolerance to PMB (42). This signalling pathway remains severely under characterized  
254 in *K. pneumoniae*. We observed partial tolerance to PMB when a frameshift mutation was apparent  
255 at nucleotide 118; however, full resistance in PMB\_4 was promoted by alterations in *mgrB* (D29Y)  
256 and *yciM* (V43G), which has recently been identified to cause resistance (38). Conversely, PMB\_3  
257 also harbored a frameshift mutation early in the coding sequence of *qseC*  
258 (GCCTGAGCCTGC17 $\Delta^{\text{fs}}$ ), although an additional I283L change in the histidine kinase region  
259 resulted in an MIC of 4  $\mu\text{g/ml}$ . This did not explain the full resistance profile exhibited by PMB\_3  
260 and due to the presence of both alleles during complementation, the true extent of resistance cannot  
261 be deduced. Considering PMB\_3 still resulted in the addition of Ara4N to lipid A, we speculate  
262 that due to the perturbation in the QseC kinase, this is increasing the accumulation of  
263 phosphorylated QseB and allows for the up-regulation of transcriptional targets. Subsequent

264 transcription could be activating PmrA, similar to other TCS in *K. pneumoniae*, allowing for the  
265 expression of the *pmrHFJKLM* operon (Fig. 5A).

266 The mutation pattern was greatly different in OctC4-exposed replicates, with all harboring  
267 alterations in the Mla pathway. These genes are responsible for phospholipid (PL) importation  
268 from the outer membrane into the cell (43). Removal of *mlaC* in *E. coli* was previously identified  
269 to increase the abundance of palmitoylated lipid A to stabilise the outer membrane which  
270 correlated to the phenotype in our study. Similarly, prior research exposing *P. aeruginosa* to OctC4  
271 (32 µg/ml) revealed an increase in palmitoylated lipid A (22). Literature reports have demonstrated  
272 that octapeptins have the capacity to bind to PLs (44), and likely OctC4 utilises this pathway in  
273 order to traverse to the outer membrane (Fig. 5B). The involvement of PqiB in membrane integrity  
274 has only recently been characterized in *E. coli* (45). PqiB was identified to connect to PqiC and  
275 potentially deliver substrate/s from the outer to inner membrane. The contribution of the PqiABC  
276 appeared minimal compared to the Mla pathway and was proposed to either ineffectively transport  
277 PLs or transport different substrates with a minute impact on membrane integrity. The contribution  
278 of the Pqi and Mla pathway appeared to be additive when evaluating the MIC reduction in OctC4\_1  
279 and OctC4\_2. Further genes impacted not homogeneous amongst the colonies included *rpsA* (40S  
280 ribosomal protein), *azoR* (quinone reductase), *traH* (plasmid conjugal transfer protein) and *hinT*  
281 (purine nucleoside phosphoramidase), which may indicate several intracellular targets (46-49).  
282 The lack of mutations associated with Ara4N-modifications to lipid A is consistent with the lipid  
283 A profile of the OctC4-induced isolates. This observation supports the hypothesis that the  
284 octapeptins work by a different mode of action compared to the polymyxins, one that does not  
285 require an initial binding to lipid A and explains the lack of cross-resistance between the two  
286 classes of lipopeptides. However, further studies are required to determine if this occurs

287 ubiquitously for *K. pneumoniae* and if the same phenomenon is observed for other Gram-negative  
288 pathogens. The slow progression of resistance, potential fitness cost if resistance develops, and the  
289 alternative mechanism of infiltration of OctC4 highlight the potential for octapeptins to be  
290 explored as future antibiotics.

291 **MATERIALS AND METHODS**

292 **Bacterial strains and growth conditions.** Clinical polymyxin-susceptible XDR *K. pneumoniae*  
293 ST258 isolate, 20\_GR\_12, was sourced through Hygeia General Hospital, Athens, Greece as  
294 previously described (24). Cultures were grown in Luria-Bertani (LB) broth and for single colony  
295 isolation, cultures were grown on either LB or Nutrient Agar (NA) plates.

296 **Antimicrobial susceptibility assays.** Minimum inhibitory concentration was determined by the  
297 broth microdilution method according to Clinical & Laboratory Standards Institute (CLSI)  
298 guidelines (50). Cultures were grown in cation-adjusted MHB and to assess cross-resistance of  
299 day 20 isolates, broth was supplemented with the concentration of antibiotic tolerated at that time  
300 point (see Table S1 in the supplemental material). Clinical breakpoints were determined in  
301 concordance to CLSI guidelines (51) and tigecycline as per The European Committee on  
302 Antimicrobial Susceptibility Testing (EUCAST) (Version 8.0, 2018) (see <http://www.eucast.org>).

303 **Induction of resistance.** A single colony of the clinical isolate was selected and grown overnight  
304 at 37°C shaking at 220 rpm. Similar to the broth microdilution assay, this culture was grown to  
305 log phase ( $OD_{600} = 0.4-0.6$ ). The culture was plated out into three separate 96-well polystyrene,  
306 non-treated plates (Sigma Aldrich) with six replicates for each treatment group including CST,  
307 PMB and OctC4. Plates were incubated overnight and  $OD_{600}$  was read at 20 h. The well which  
308 harbored dense growth ( $OD_{600} \geq 1$ ) underwent a 1:1000 dilution, transferred to a new plate with  
309 the concentration range adjusted accordingly. The highest concentration used for the polymyxins  
310 was 128  $\mu\text{g/ml}$  and 32  $\mu\text{g/ml}$  for OctC4. This process was completed for 20 days with five  
311 following days of no antibiotic exposure. At day 20, the culture was further diluted (1:1000) and  
312 placed in non-supplemented broth to be incubated overnight. Part of this culture underwent an  
313 MIC against the antibiotic it was exposed to in order to evaluate stability of resistance. Several



314 time points were isolated and stored in 30% sterile glycerol at -80°C for future assays. Fold change  
315 significance was determined via GraphPad Prism 7 with a one-way ANOVA with a Tukey's  
316 multiple comparisons test where significance was  $P < 0.05$ .

317 **Lipid A modifications.** Lipid A was extracted using the ammonium hydroxide-isobutyric acid  
318 protocol as previously described (52). Day 20 cultures were grown overnight in LB supplemented  
319 with antibiotic (see Table S1 in the supplemental material). Overnight inoculums were subcultured  
320 (1:100) into 100 mL LB broth and grown to an  $OD_{600} = 0.8-1$ . Cultures were pelleted (10,000 rpm,  
321 20 min, 4°C), washed with 1X PBS (10,000 rpm, 15 min, 4°C) and freeze dried. 10 mg of  
322 lyophilised cells were processed as per (52). Concisely, samples were suspended in isobutyric  
323 acid:ammonium hydroxide (5:3 [vol/vol]), under magnetic stirring at 100°C for 4 h, supernatants  
324 isolated by centrifugation at 13,000 rpm for 15 min, diluted with equal volume of water and freeze  
325 dried. Extracts then underwent two methanol washes (4,000 rpm, 15 min). The extracted lipid A  
326 was solubilised in methanol containing 5 mM ammonium acetate to a concentration of 1 µg/ml.  
327 Samples were infused at a low rate of 5 µl/min into a QSTAR Elite (Applied Biosystems) hybrid  
328 quadrupole Time-of-Flight (TOF) mass spectrometer. To acquire adequate fragmentation for  
329 MS/MS analysis, the collision energy was increased from 40 to 80. Averaged spectra were  
330 accumulated over at least 1 min. Data were exported from Analyst (SCIEX), normalized to the  
331 highest mass intensity and graphed in GraphPad Prism 7.

332 **DNA extractions and library preparation.** Glycerol stocks from day 20 isolates were grown on  
333 NA plates overnight. Single colonies were isolated, grown in antibiotic supplemented broth (see  
334 Table S1 in the supplemental material), incubated overnight and DNA extracted using the DNeasy  
335 Blood and Tissue Kit (Qiagen) according to manufacturer's guidelines. Two colonies were  
336 selected from day 0 and 4 colonies from 4 replicates per treatment group. Quantification of DNA

337 was acquired using Qubit®3.0 (ThermoFisher Scientific) and 1 ng of DNA underwent library  
338 preparation with the Nextera XT kit (Illumina) as per manufacturer's instructions. Quality control  
339 was checked with a 2100 Bioanalyzer (Agilent Technologies) and LabChip GX (PerkinElmer).

340 **Sequencing and analysis.** Libraries were sequenced on an Illumina NextSeq with 150 bp paired  
341 end sequencing reads with  $\geq 95X$  coverage with the exception of CST\_2 (colony 1) (48X).  
342 Trimmomatic (53) was used to trim paired end reads and SPAdes v3.10.1 implemented for  
343 assembly (54). Annotation of assembled genomes was accomplished using the Rapid Annotation  
344 using Subsystem Technology (RAST) (55). The Centre for Genomic Epidemiology (CGE) tools  
345 were implemented to delineate laterally acquired resistant genes (ResFinder 3.0) (56) and plasmids  
346 (PlasmidFinder 1.3) (57). Reads were aligned using BWA-MEM (58), analyzed through  
347 FreeBayes (59) and impact of change determined through snpEff (60). Nucleotide sequences have  
348 been deposited under NCBI BioProject PRJNA415530  
349 ([www.ncbi.nlm.nih.gov/bioproject/415530](http://www.ncbi.nlm.nih.gov/bioproject/415530)).

350 **Complementation assays.** Genes speculated to cause resistance underwent complementation as  
351 previously described (61). Briefly, genes harboring a potential variation contributing to resistance  
352 was amplified using the 2X Phusion HF master mix (ThermoFisher) with primers listed in Table  
353 S2 in the supplemental material. The gene was cloned into the pCR-BluntII-TOPO using the Zero  
354 Blunt TOPO PCR cloning kit (Invitrogen). The plasmid was transformed in electrocompetent *E.*  
355 *coli* TOP10 via electroporation, grown overnight on MHB agar supplemented with kanamycin (50  
356  $\mu\text{g/ml}$ ) at 37°C overnight and plasmids extracted using the QIAprep spin miniprep column kit  
357 (Qiagen). Plasmids were transformed into the initial susceptible strain (20\_GR\_12) and incubated  
358 overnight on MHB agar containing zeocin (1500  $\mu\text{g/ml}$ ). Furthermore, the wild-type gene was

359 amplified from the initial strain and placed into the resistant day 20 isolates. An MIC was  
360 conducted to determine if resistance was altered as mentioned above.

361

## 362 **ACKNOWLEDGEMENTS**

363 MAC is an NHMRC Principal Research Fellow (APP1059354) and currently holds a fractional  
364 Professorial Research Fellow appointment at the University of Queensland with his remaining time  
365 as CEO of Inflazome Ltd. a company headquartered in Dublin, Ireland that is developing drugs to  
366 address clinical unmet needs in inflammatory disease by targeting the inflammasome. LJMC is an  
367 ARC Future Fellow (FT110100972). MEP is an Australian Postgraduate Award scholar. MATB  
368 is supported in part by a Wellcome Trust Strategic Award 104797/Z/14/Z. Research was supported  
369 by NHMRC grants APP1005350, APP1045326 and NIH grant R21AI098731/R33AI098731-03.  
370 We would like to acknowledge Dr Ilias Karaikos and Dr Helen Giamarellou for supplying this  
371 clinical isolate and Dr Alysha Elliott for the initial characterization of the strain. We thank Dr  
372 Alejandra Gallardo-Godoy, Dr Karl Hansford, David Edwards and Ruby Pelingon for the synthesis  
373 and purification of OctC4, Dr Tim Bruxner and Angelika Christ for their support with the  
374 sequencing, Alun Jones with his assistance for mass spectrometry which was acquired at the IMB  
375 Mass Spectrometry Facility at UQ, and Dr Hannah Sidjabat for her assistance with the initial  
376 quality control of the resistance induced strains.

377 **Author contributions.** MEP, MAC, LJMC, MATB conceived this study. MEP, MDC and DG  
378 performed the sequencing analysis and MEP, MSB and SR performed the experiments. MEP wrote  
379 the paper with the input from other authors.

380 **Conflict of interest.** None.

381 **REFERENCES**

- 382 1. Bhatt P, Tandel K, Shete V, Rathi KR. 2015. Burden of extensively drug-resistant and  
383 pandrug-resistant Gram-negative bacteria at a tertiary-care centre. *New Microbes New*  
384 *Infect* 8:166-170.
- 385 2. Karaiskos I, Giamarellou H. 2014. Multidrug-resistant and extensively drug-resistant  
386 Gram-negative pathogens: current and emerging therapeutic approaches. *Expert Opin*  
387 *Pharmacother* 15:1351-1370.
- 388 3. Falagas ME, Maraki S, Karageorgopoulos DE, Kastoris AC, Mavromanolakis E, Samonis  
389 G. 2009. Antimicrobial susceptibility of multidrug-resistant (MDR) and extensively drug-  
390 resistant (XDR) Enterobacteriaceae isolates to fosfomycin. *J Antimicrob Agents* 35:240-  
391 243.
- 392 4. Arca P, Reguera G, Hardisson C. 1997. Plasmid-encoded fosfomycin resistance in bacteria  
393 isolated from the urinary tract in a multicentre survey. *J Antimicrob Chemother* 40:393-  
394 399.
- 395 5. Liu YY, Wang Y, Walsh TR, Yi LX, Zhang R, Spencer J, Doi Y, Tian G, Dong B, Huang  
396 X, Yu LF, Gu D, Ren H, Chen X, Lv L, He D, Zhou H, Liang Z, Lui JH, Shen J. 2016  
397 Emergence of plasmid-mediated colistin resistance mechanism MCR-1 in animals and  
398 human beings in China: a microbiological and molecular biological study. *Lancet Infect*  
399 *Dis* 16:161-168.
- 400 6. Tsuruoka T, Miyata A, Yamada Y. 1978. Two kinds of mutants defective in multiple  
401 carbohydrate utilization isolated from in vitro fosfomycin-resistant strains of *Escherichia*  
402 *coli* K-12. *J Antibiot (Tokyo)* 31:192-201.

- 403 7. Sun Y, Cai Y, Liu X, Bai N, Liang B, Wang R. 2013. The emergence of clinical resistance  
404 to tigecycline. *Int J Antimicrob Agents* 41:110-116.
- 405 8. Cheng HY, Chen YF, Peng HL. 2010. Molecular characterization of the PhoPQ-PmrD-  
406 PmrAB mediated pathway regulating polymyxin B resistance in *Klebsiella pneumoniae*  
407 CG43. *J Biomed Sci* 17:60.
- 408 9. Cannatelli A, Giani T, D'Andrea MM, Di Pilato V, Arena F, Conte V, Tryfinopoulou K,  
409 Vatopoulos A, Rossolini GM, COLGRIT Study Group. 2014. MgrB inactivation is a  
410 common mechanism of colistin resistance in KPC-producing *Klebsiella pneumoniae* of  
411 clinical origin. *Antimicrob Agents Chemother* 58:5696-5703.
- 412 10. Becker B, Butler MS, Hansford KA, Gallardo-Godoy A, Elliott AG, Huang JX, Edwards  
413 DJ, Blaskovich MAT, Cooper MA. 2017. Synthesis of octapeptin C4 and biological  
414 profiling against NDM-1 and polymyxin-resistant bacteria. *Bioorg Med Chem Lett*  
415 27:2407-2409.
- 416 11. Velkov T, Roberts KD, Li J. 2017. Rediscovering the octapeptins. *Nat Prod Rep* 34:295-  
417 309.
- 418 12. Qian CD, Wu XC, Teng Y, Zhao WP, Li O, Fang SG, Huang ZH, Gao HC. 2012. Battacin  
419 (Octapeptin B5), a new cyclic lipopeptide antibiotic from *Paenibacillus tianmuensis* active  
420 against multidrug-resistant Gram-negative bacteria. *Antimicrob Agents Chemother*  
421 56:1458-1465.
- 422 13. Koike M, Iida K, Matsuo T. 1969. Electron microscopic studies on mode of action of  
423 polymyxin. *J Bacteriol* 97:448-452.

- 424 14. Clausell A, Garcia-Subirats M, Pujol M, Busquets MA, Rabanal F, Cajal Y. 2007. Gram-  
425 negative outer and inner membrane models: insertion of cyclic cationic lipopeptides. *J Phys*  
426 *Chem B* 111:551-563.
- 427 15. Raetz CR, Reynolds CM, Trent MS, Bishop RE. 2007. Lipid A modification systems in  
428 gram-negative bacteria. *Annu Rev Biochem* 76:295-329.
- 429 16. Olaitan AO, Morand S, Rolain JM. 2014. Mechanisms of polymyxin resistance: acquired  
430 and intrinsic resistance in bacteria. *Front Microbiol* 5:643.
- 431 17. Cheng YH, Lin TL, Lin YT, Wang JT. 2016. Amino acid substitutions of CrrB responsible  
432 for resistance to colistin through CrrC in *Klebsiella pneumoniae*. *Antimicrob Agents*  
433 *Chemother* 60:3709-3716.
- 434 18. Vaara M, Siikanen O, Apajalahti J, Fox J, Frimodt-Møller N, He H, Poudyal A, Li J, Nation  
435 RL, Vaara T. 2010. A novel polymyxin derivative that lacks the fatty acid tail and carries  
436 only three positive charges has strong synergism with agents excluded by the intact outer  
437 membrane. *Antimicrob Agents Chemother* 54:3341-3346.
- 438 19. Meyers E, Parker WL, Brown WE, Linnett P, Strominger JL. 1974. EM49: a new  
439 polypeptide antibiotic active against cell membranes. *Ann N Y Acad Sci* 235:493-501.
- 440 20. Chitty JL, Butler MS, Suboh A, Edwards DJ, Cooper MA, Fraser JA, Robertson AAB.  
441 2017. Antimicrobial octapeptin C4 analogues active against *Cryptococcus* species.  
442 *Antimicrob Agents Chemother* pii: AAC.00986-17.
- 443 21. Han M-L, Shen HH, Hansford KA, Schneider EK, Sivanesan S, Roberts KD, Thompson  
444 PE, Le Brun AP, Zhu Y, Sani MA, Separovic F, Blaskovich MAT, Baker MA, Moskowitz  
445 SM, Cooper MA, Li J, Velkov T. 2017. Investigating the interaction of Octapeptin A3 with  
446 model bacterial membranes. *ACS Infect Dis* 3:606-619.

- 447 22. Velkov T, Gallardo-Godoy A, Swarbrick JD, Blaskovich MAT, Elliott AG, Han M,  
448 Thompson PE, Roberts KD, Huang JX, Becker B, Butler MS, Lash LH, Henriques ST,  
449 Nation RL, Sivanesan S, Sani M-A, Separovic F, Mertens H, Bulach D, Seemann T, Owen  
450 J, Li J, Cooper MA. Structure, Function, and Biosynthetic Origin of Octapeptin Antibiotics  
451 Active against Extensively Drug-Resistant Gram-Negative Bacteria. *Cell Chem Biol*  
452 doi:10.1016/j.chembiol.2018.01.005.
- 453 23. Meyers E, Pansy FE, Basch HI, McRipley RJ, Slusarchyk DS, Graham SF, Trejo WH.  
454 1973. EM49, a new peptide antibiotic. III. biological characterization *in vitro* and *in vivo*.  
455 *J Antibiot (Tokyo)* 26:457-462.
- 456 24. Pitt ME, Elliott AG, Cao MD, Ganesamoorthy D, Karaikos I, Giamarellou H, Abboud  
457 CS, Blaskovich MAT, Cooper MA, Coin LJM. 2018. Multifactorial chromosomal variants  
458 regulate polymyxin resistance in extensively drug-resistant *Klebsiella pneumoniae*. *Microb*  
459 *Genom* doi: 10.1099/mgen.0.000158.
- 460 25. Navon-Venezia S, Kondratyeva K, Carattoli A. 2017. *Klebsiella pneumoniae*: a major  
461 worldwide source and shuttle for antibiotic resistance. *FEMS Microbial Rev* 41:252-275.
- 462 26. Bowers JR, Kitchel B, Driebe EM, MacCannell DR, Roe C, Lemmer D, de Man T, Rasheed  
463 JK, Engelthaler DM, Keim P, Limbago BM. 2015. Genomic analysis of the emergence and  
464 rapid global dissemination of the clonal group 258 *Klebsiella pneumoniae* pandemic. *PLoS*  
465 *One* 10: e0133727.
- 466 27. Kitchel B, Rasheed JK, Patel JB, Srinivasan A, Navon-Venezia S, Carmeli Y, Brolund A,  
467 Giske CG. 2009. Molecular epidemiology of KPC-producing *Klebsiella pneumoniae*  
468 isolates in the United States: clonal expansion of multilocus sequence type 258. *Antimicrob*  
469 *Agents Chemother* 53:3365-3370.

- 470 28. Munoz-Price LS, Poirel L, Bonomo RA, Schwaber MJ, Daikos GL, Cormican M,  
471 Cornaglia G, Garau J, Gniadkowski M, Hayden MK, Kumarasamy K, Livermore DM,  
472 Maya JJ, Nordmann P, Patel JB, Paterson DL, Pitout J, Villegas MV, Wang H, Woodford  
473 N, Quinn JP. 2013. Clinical epidemiology of the global expansion of *Klebsiella*  
474 *pneumoniae* carbapenemases. *Lancet Infect Dis* 13:785-796.
- 475 29. Pogue JM, Lee J, Marchaim D, Yee V, Zhao JJ, Chopra T, Lephart P, Kayes KS. 2011.  
476 Incidence of and risk factors for colistin-associated nephrotoxicity in a large academic  
477 health system. *Clin Infect Dis* 53:879-884.
- 478 30. Arena F, Henrici De Angelis L, Cannatelli A, Di Pilato V, Amorese M, D'Andrea MM,  
479 Giani T, Rossolini GM. 2016. Colistin resistance caused by inactivation of the MgrB  
480 regulator is not associated with decreased virulence of sequence type 258 KPC  
481 carbapenemase-producing *Klebsiella pneumoniae*. *Antimicrob Agents Chemother*  
482 60:2509-2512.
- 483 31. Lee JY, Choi MJ, Choi HJ, Ko KS. 2015. Preservation of acquired colistin resistance in  
484 Gram-negative bacteria. *Antimicrob Agents Chemother* 60:609-612.
- 485 32. Lee GC, Burgess DS. 2012. Treatment of *Klebsiella pneumoniae* carbapenemase (KPC)  
486 infections: a review of published case series and case reports. *Ann Clin Microbiol*  
487 *Antimicrob* 11:32.
- 488 33. Dickstein Y, Leibovici L, Yahav D, Eliakim-Raz N, Daikos GL, Skiada A, Antoniadou A,  
489 Carmeli Y, Nutman A, Levi I, Adler A, Durante-Mangoni E, Andini R, Cavezza G, Mouton  
490 JW, Wijma RA, Theuretzbacher U, Friberg LE, Kristoffersson AN, Zusman O, Koppel F,  
491 Dishon Benattar T, Altunin S, Paul M, AIDA consortium. 2016. Multicentre open-label  
492 randomised controlled trial to compare colistin alone with colistin plus meropenem for the



- 493 treatment of severe infections caused by carbapenem-resistant Gram-negative infections  
494 (AIDA): a study protocol. *BMJ Open* 6:e009956.
- 495 34. Wright MS, Suzuki Y, Jones MB, Marshall SH, Rudin SD, van Duin D, Kaye K, Jacobs  
496 MR, Bonomo RA, Adams MD. 2015. Genomic and transcriptomic analyses of colistin-  
497 resistant clinical isolates of *Klebsiella pneumoniae* reveal multiple pathways of resistance.  
498 *Antimicrob Agents Chemother* 59:536-543.
- 499 35. Schwarz S, Kehrenberg C, Doublet B, Cloeckaert A. 2004. Molecular basis of bacterial  
500 resistance to chloramphenicol and florfenicol. *FEMS Microbiology Rev* 28:519-542.
- 501 36. Civljak R, Giannella M, Di Bella S, Petrosillo N. 2014. Could chloramphenicol be used  
502 against ESKAPE pathogens? A review of *in vitro* data in the literature from the 21st  
503 century. *Expert Rev Anti Infect Ther* 12:249-264.
- 504 37. Abdul Rahim N, Cheah Se, Johnson MD, Yu H, Sidjabat HE, Boyce J, Butler MS, Cooper  
505 MA, Fu J, Paterson DL, Nation RL, Bergen PJ, Velkov, Li J. 2015. Synergistic killing of  
506 NDM-producing MDR *Klebsiella pneumoniae* by two 'old' antibiotics-polymyxin B and  
507 chloramphenicol. *J Antimicrob Chemother* 70:2589-2597.
- 508 38. Halaby T, Kucukkose E, Janssen AB, Rogers MR, Doorduyn DJ, van der Zanden AG, Al  
509 Naiemi N, Vandenbroucke-Grauls CM, van Schaik W. 2016. Genomic characterization of  
510 colistin heteroresistance in *Klebsiella pneumoniae* during a nosocomial outbreak.  
511 *Antimicrob Agents Chemother* 60:6837-6843.
- 512 39. Baron S, Hadjadj L, Rolain J-M, Olaitan AO. 2016. Molecular mechanisms of polymyxin  
513 resistance: knowns and unknowns. In *J Antimicrob Agents* 48:583-591.
- 514 40. Guckes KR, Kostakioti M, Breland EJ, Gu AP, Shaffer CL, Martinez CR 3<sup>rd</sup>, Hultgren SJ,  
515 Hadjifrangiskou M. 2013. Strong cross-system interactions drive the activation of the QseB

- 516 response regulator in the absence of its cognate sensor. Proc Natl Acad Sci USA  
517 110:16592-16597.
- 518 41. Breland EJ, Zhang EW, Bermudez T, Martinez CR III, Hadjifrangiskou M. 2017. The  
519 histidine residue of QseC is required for canonical signaling between QseB and PmrB in  
520 uropathogenic *Escherichia coli*. J Bacteriol 199:pii:e00060-17.
- 521 42. Guckes KR, Breland EJ, Zhang EW, Hanks SC, Gill NK, Algood HM, Schmitz JE, Stratton  
522 CW, Hadjifrangiskou M. 2017. Signaling by two-component system noncognate partners  
523 promotes intrinsic tolerance to polymyxin B in uropathogenic *Escherichia coli*. Sci Signal  
524 10: pii: eaag1775.
- 525 43. Malinverni JC, Silhavy TJ. 2009. An ABC transport system that maintains lipid asymmetry  
526 in the Gram-negative outer membrane. Proc Natl Acad Sci USA 106:8009-8014.
- 527 44. Swanson PE, Paddy MR, Dahlquist FW, Storm DR. 1980. Characterization of octapeptin-  
528 membrane interactions using spin-labeled octapeptin. Biochemistry 19:3307-3314.
- 529 45. Nakayama T, Zhang-Akiyama Q-M. 2016. pqiABC and yebST, putative mce operons of  
530 *Escherichia coli*, encode transport pathways and contribute to membrane integrity. J  
531 Bacteriol 199: pii: e00606-16.
- 532 46. Duval M, Korepanov A, Fuchsbaauer O, Fechter P, Haller A, Fabbretti A, Choulier L,  
533 Micura R, Klaholz BP, Romby P, Springer M, Marzi S. 2013. *Escherichia coli* ribosomal  
534 protein S1 unfolds structured mRNAs onto the ribosome for active translation initiation.  
535 PLoS Biol 11:e1001731.
- 536 47. Liu G, Zhou J, Fu QS, Wang J. 2009. The *Escherichia coli* azoreductase AzoR Is involved  
537 in resistance to thiol-specific stress caused by electrophilic quinones. J Bacteriol 191:6394-  
538 6400.

- 539 48. Arutyunov D, Arenson B, Manchak J, Frost LS. 2010. F plasmid TraF and TraH are  
540 components of an outer membrane complex involved in conjugation. *J Bacteriol* 192:1730-  
541 1734.
- 542 49. Chou TF, Bieganowski P, Shilinski K, Cheng J, Brenner C, Wagner CR. 2005. <sup>31</sup>P NMR  
543 and genetic analysis establish *hinT* as the only *Escherchia coli* purine nucleoside  
544 phosphoramidase and as essential for growth under high salt conditions. *J Biol Chem*  
545 280:15356-15361.
- 546 50. Clinical and Laboratory Standards Institute. 2015. M07-A10. Methods for Dilution  
547 Antimicrobial Susceptibility Tests for Bacteria That Grow Aerobically; Approved  
548 Standard-Tenth Edition. CLSI, Wayne, PA.
- 549 51. Clinical and Laboratory Standards Institute. 2016. Performance Standards for  
550 Antimicrobial Susceptibility Testing— Twenty-sixth Edition: Approved standard M100S.  
551 CLSI, Wayne, PA.
- 552 52. Choi MJ, Ko KS. 2015. Loss of hypermucoviscosity and increased fitness cost in colistin-  
553 resistant *Klebsiella pneumoniae* sequence type 23 strains. *Antimicrob Agents Chemother*  
554 59:6763-6773.
- 555 53. Bolger AM, Lohse M, Usadel B. 2014. Trimmomatic: a flexible trimmer for Illumina  
556 sequence data. *Bioinformatics* 30:2114-2120.
- 557 54. Bankevich A, Nurk S, Antipov D, Gurevich AA, Dvorkin M, Kulikov AS, Lesin VM,  
558 Nikolenko SI, Pham S, Prjibelski AD, Pyshkin AV, Sirotkin AV, Vyahhi N, Tesler G,  
559 Alekseyev MA, Pevzner PA. 2012. SPAdes: a new genome assembly algorithm and its  
560 applications to single-cell sequencing. *J Comput Biol* 19:455-477.

- 561 55. Aziz RK, Bartels D, Best AA, DeJongh M, Disz T, Edwards RA, Formsma K, Gerdes S,  
562 Glass EM, Kubal M, Meyer F, Olsen GJ, Olson R, Osterman AL, Overbeek RA, McNeil  
563 LK, Paarmann D, Paczian T, Parrello B, Pusch GD, Reich C, Stevens R, Vassieva O,  
564 Vonstein V, Wilke A, Zagnitko O. 2008. The RAST Server: rapid annotations using  
565 subsystems technology. *BMC Genomics* 9:75.
- 566 56. Zankari E, Hasman H, Cosentino S, Vestergaard M, Rasmussen S, Lund O, Aarestrup FM,  
567 Larsen MV. 2012. Identification of acquired antimicrobial resistance genes. *J Antimicrob*  
568 *Chemother* 67:2640-2644.
- 569 57. Carattoli A, Zankari E, García-Fernández A, Voldby Larsen M, Lund O, Villa L, Møller  
570 Aarestrup F, Hasman H. 2014. *In silico* detection and typing of plasmids using  
571 PlasmidFinder and plasmid multilocus sequence typing. *Antimicrob Agents Chemother*  
572 58:3895-3903.
- 573 58. Li H, Durbin R. 2009. Fast and accurate short read alignment with Burrows-Wheeler  
574 transform. *Bioinformatics* 25:1754-1760.
- 575 59. Garrison E, Marth G. 2012. Haplotype-based variant detection from short-read sequencing.  
576 arXiv preprint arXiv:1207.3907 [q-bioGN].
- 577 60. Cingolani P, Platts A, Wang le L, Coon M, Nguyen T, Wang L, Land SJ, Lu X, Ruden  
578 DM. 2012. A program for annotating and predicting the effects of single nucleotide  
579 polymorphisms, SnpEff: SNPs in the genome of *Drosophila melanogaster* strain w1118;  
580 iso-2; iso-3. *Fly (Austin)* 6:80-92.
- 581 61. Jayol A, Poirel L, Brink A, Villegas MV, Yilmaz M, Nordmann P. 2014. Resistance to  
582 colistin associated with a single amino acid change in protein PmrB among *Klebsiella*  
583 *pneumoniae* isolates of worldwide origin. *Antimicrob Agents Chemother* 58:4762-4766.

584 **FIGURES & TABLES**

585

586

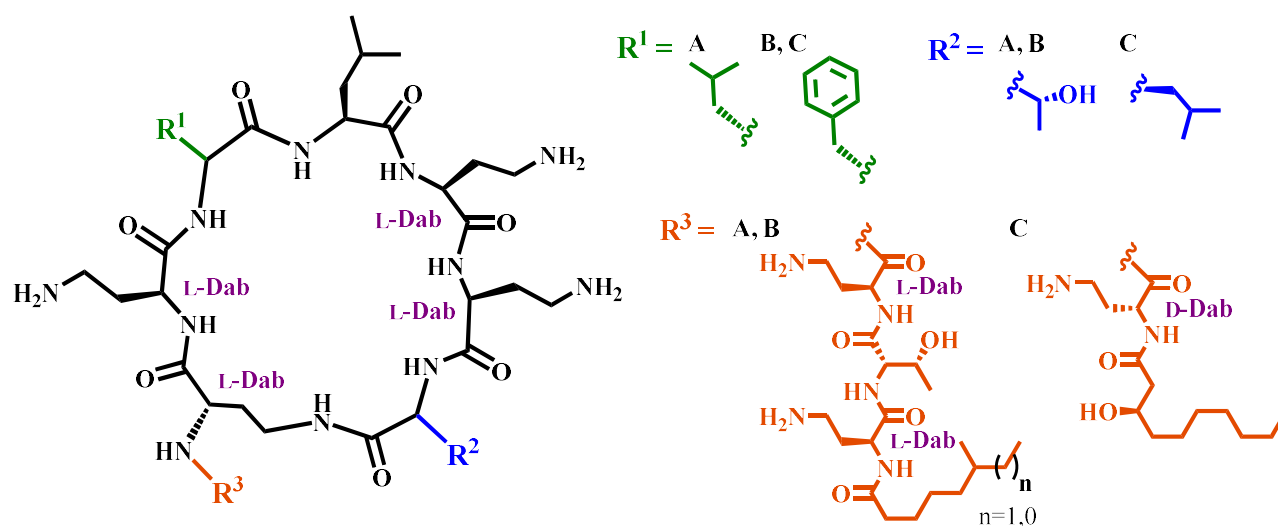

587

588

589 **FIG 1** Structural comparison between the 3 lipopeptide antibiotics used in this study. Colistin (A)

590 and polymyxin B (B) differ by one amino acid (polymyxin B: **phenylalanine** and colistin: **leucine**

591 (**R<sup>1</sup>**)). One defining feature of octapeptin C4 (C) is that it contains 8 amino acids rather than 10 in

592 polymyxins. In addition, a **leucine** residue replaces **threonine** within the ring (**R<sup>2</sup>**), the exocyclic

593 **diaminobutyric acid (Dab)** residue is the D-enantiomer, and the **fatty acid tail** contains a 3-hydroxy

594 group (**R<sup>3</sup>**).

595

596

597

598

599

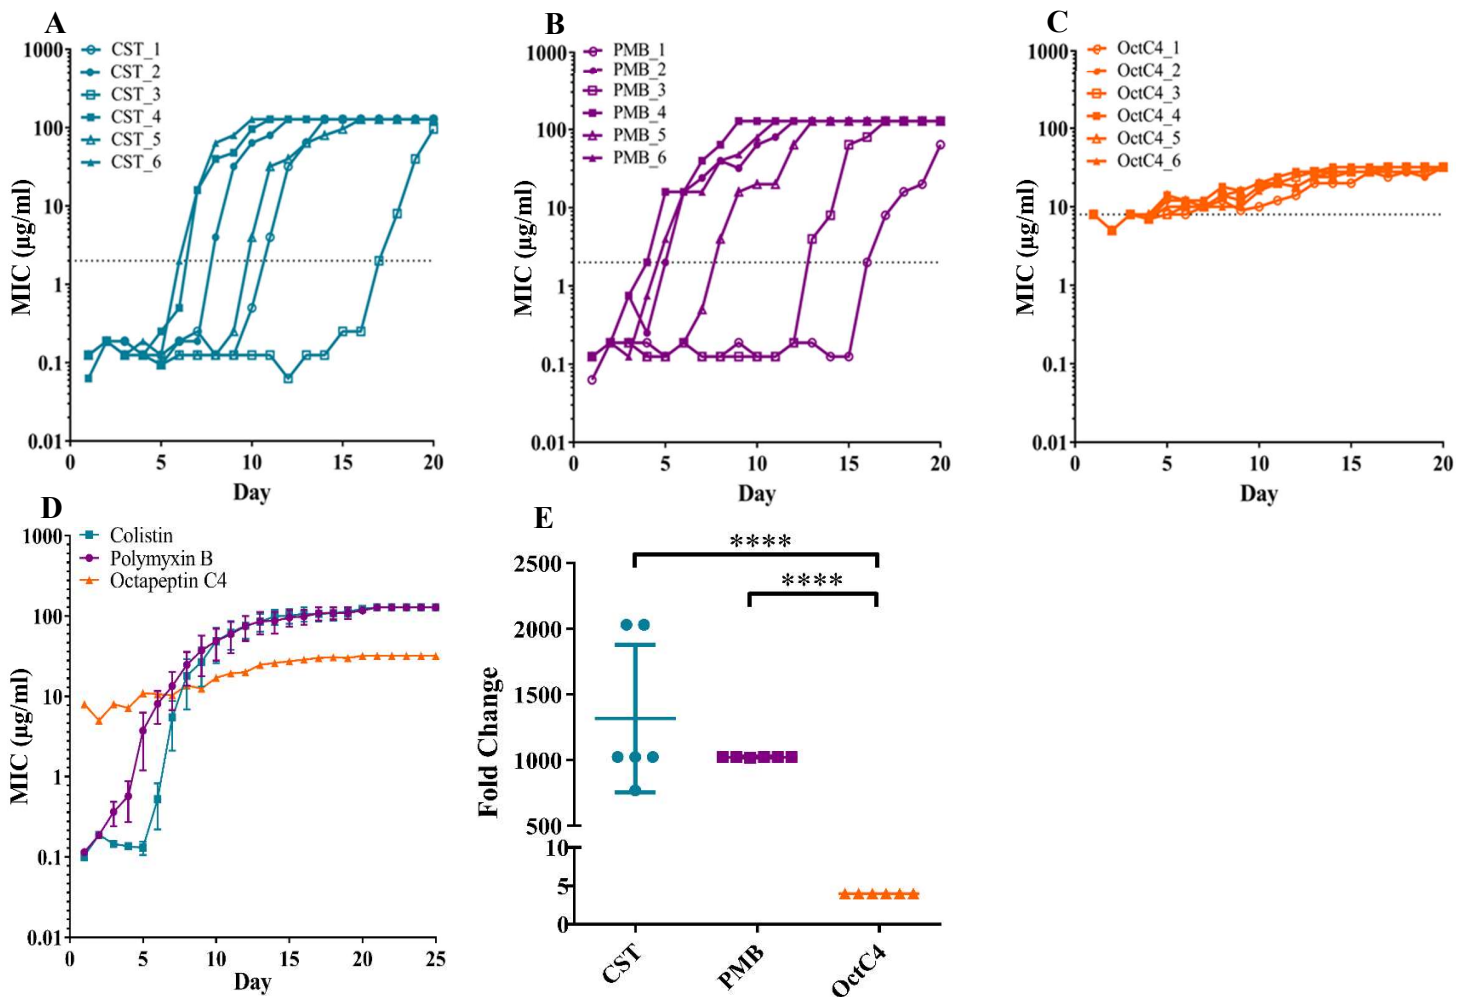

610

611 **FIG 2** Acquired resistance in extensively drug-resistant *K. pneumoniae* over time for polymyxins  
612 and octapeptin C4. (A) Colistin (B) Polymyxin B (C) Octapeptin C4 (D) Overall comparison of  
613 acquired resistance for 20 day antibiotic exposure and 5 days following without exposure  
614 (mean±SEM, n=6) (E) Fold change of colistin (CST), polymyxin B (PMB), and octapeptin C4  
615 (OctC4) in concordance to day 0 and 20 MIC (mean±SD) (\*\*\*\* $P$ <0.001). Line represents break  
616 points (2 µg/ml polymyxins, 8 µg/ml set for octapeptin to highlight divergence from day 0).  
617 Highest concentration used for polymyxins was 128 µg/ml and 32 µg/ml for octapeptin C4.

618

619

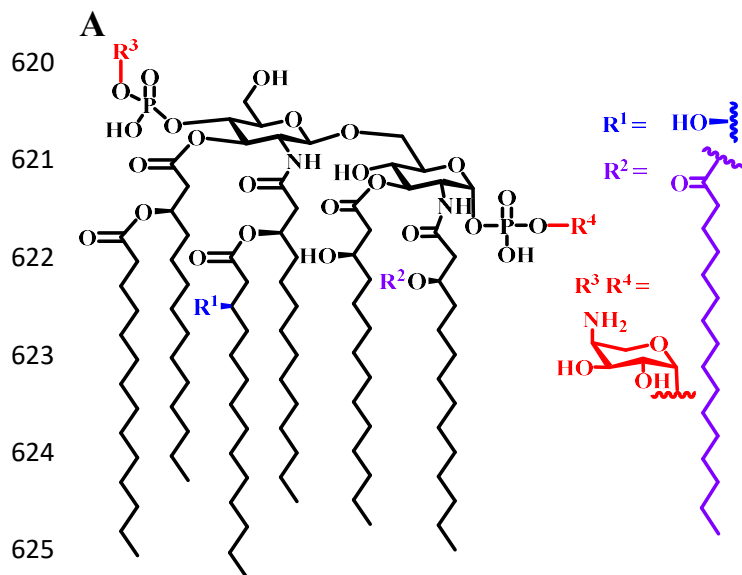

B

| $[M-2H]^{2-}$ | Species                        | Initial   | CST       | PMB       | OctC4    |
|---------------|--------------------------------|-----------|-----------|-----------|----------|
| 911.6         | WT                             | 100.0±0.0 | 6.2±4.6   | 9.6±4.8   | 84.2±7.6 |
| 919.6         | WT+OH                          | 39.5±1.1  | 10.8±7.6  | 27.0±13.7 | 100±0.0  |
| 977.1         | WT+Ara4N                       | 50.5±0.1  | 57.4±32.1 | 46.6±19   | 34.0±5.4 |
| 985.1         | WT+OH+Ara4N                    | 22.7±0.2  | 78.9±38.7 | 88.6±18.9 | 45.1±3.5 |
| 1030.7        | WT+C <sub>16</sub>             | 21.5±3.0  | 4.1±3.3   | 16.0±14.0 | 41.9±6.4 |
| 1038.7        | WT+OH+C <sub>16</sub>          | 9.9±0.0   | 3.7±3.4   | 29.0±14.0 | 62.8±4.4 |
| 1042.7        | WT+2(Ara4N)                    | 2.5±0.2   | 56.0±28.2 | 18.3±8.5  | 2.9±1.1  |
| 1050.7        | WT+OH+2(Ara4N)                 | 1.2±0.1   | 64.6±36.4 | 30.7±16.3 | 2.3±0.3  |
| 1096.3        | WT+Ara4N+C <sub>16</sub>       | 9.5±0.9   | 33.6±20.3 | 48.4±32.2 | 8.6±1.5  |
| 1104.3        | WT+OH+Ara4N+C <sub>16</sub>    | 5.2±0.5   | 33.3±18.5 | 70.5±28.1 | 21.6±3.2 |
| 1161.8        | WT+2(Ara4N)+C <sub>16</sub>    | 0.4±0.0   | 31.2±14.2 | 11.7±8.5  | 0.5±0.1  |
| 1169.8        | WT+OH+2(Ara4N)+C <sub>16</sub> | 0.3±0.0   | 26.3±20.4 | 12±5.7    | 0.5±0.1  |

626

627 **FIG 3** Lipid A modifications identified after 20 days of exposure to either colistin, polymyxin B or octapeptin C4. (A) Modifications  
 628 which were detected in wild-type (WT) hexa-acylated lipid A. This included hydroxylation of a myristate ( $R^1$ ), palmitoylation ( $R^2$ ) and  
 629 the addition of 4-amino-4-deoxy-arabinose (Ara4N) to either phosphate groups ( $R^3$ ,  $R^4$ ). (B) Doubly charged lipid A species detected  
 630 for the initial isolate (n=2) and treatment groups (n=6). Values represent mean±SD of relative peak intensities.

631

632

633

634

635

636

637

638

639

640

641

642

643

644

645

646

647

648

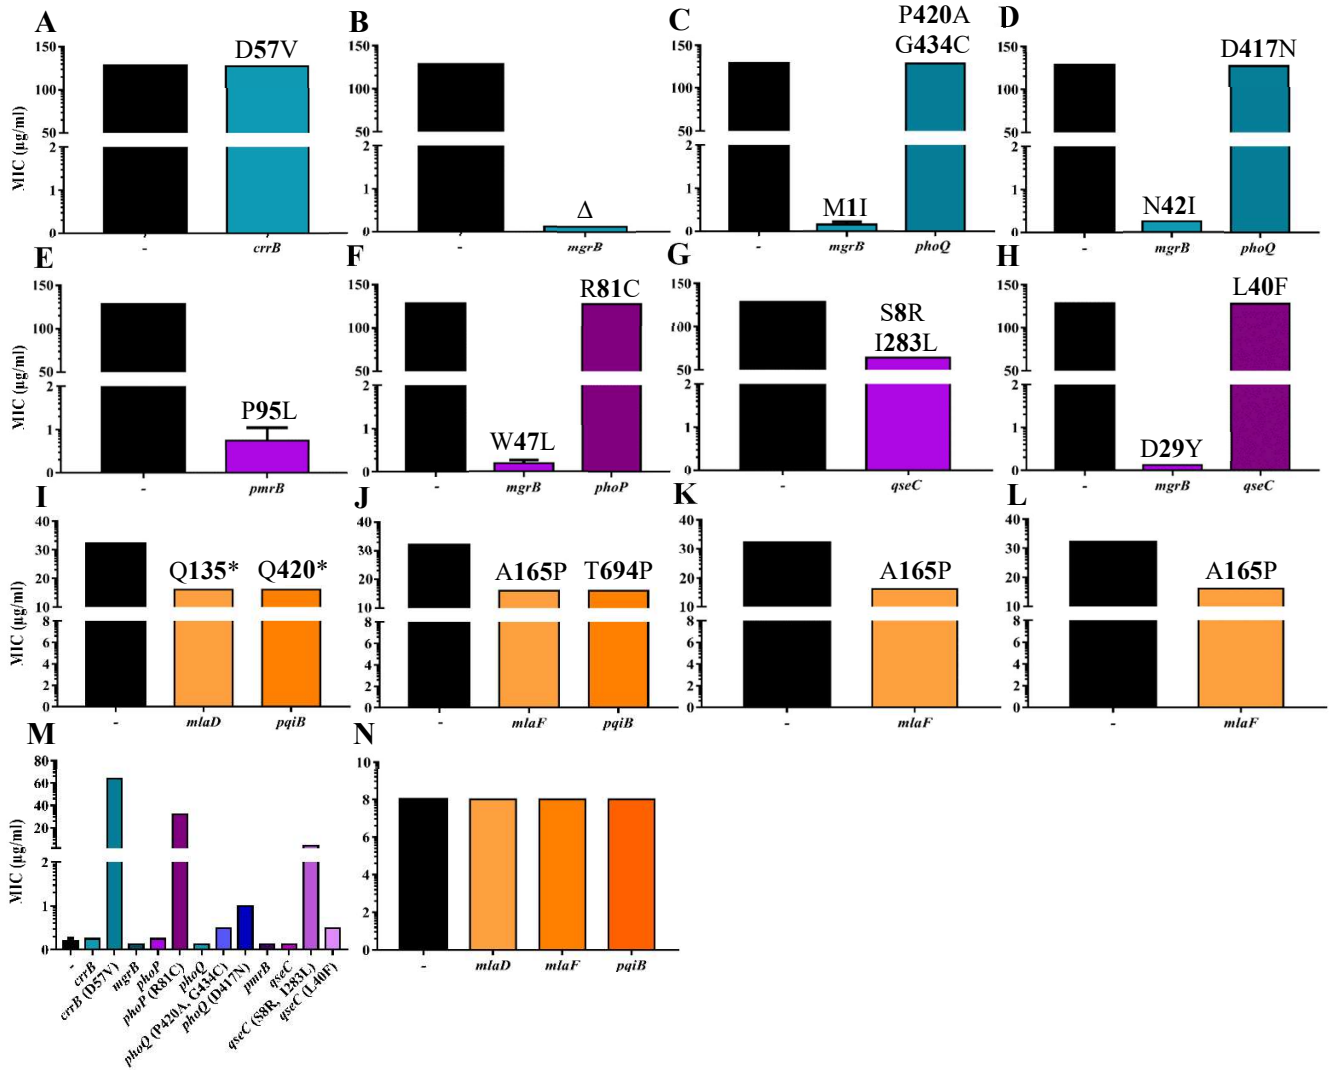



649 **FIG 4** Complementation assays to delineate contribution of variations detected in day 20 treated  
650 strains to resistance. (A-D) Colistin treatment groups complemented with WT gene. (A) CST\_1  
651 with pTOPO-*corrB*. (B) CST\_2 with pTOPO-*mgrB*. (C) CST\_3 with pTOPO-*mgrB* or pTOPO-  
652 *phoQ*. (D) CST\_4 with pTOPO-*mgrB* or pTOPO-*phoQ*. (E-H) Polymyxin B treatment groups  
653 complemented with WT gene. (E) PMB\_1 with pTOPO-*pmrB*. (F) PMB\_2 with pTOPO-*mgrB* or  
654 pTOPO-*phoP*. (G) PMB\_3 with pTOPO-*qseC*. (H) PMB\_4 with pTOPO-*mgrB* or pTOPO-*qseC*.  
655 (I-L) Octapeptin C4 treatment groups complemented with WT gene. (I) OctC4\_1 with pTOPO-  
656 *mldD* or pTOPO-*pqiB* (J) OctC4\_2 with pTOPO-*mldF* or pTOPO-*pqiB*. (K) OctC4\_3 and with  
657 pTOPO-*mldF*. (L) OctC4\_4 with pTOPO-*mldF*. (M) 20\_GR\_12, the initial strain, complemented  
658 with WT genes and genes harboring mutations potentially causing polymyxin resistance. (N)  
659 Complementation of octapeptin C4 resistance associated WT genes in 20\_GR\_12. The (-) indicates  
660 no complementation was conducted and represents the initial MIC. The y-axis split signifies the  
661 breakpoint for polymyxins (2 µg/ml) and initial MIC for octapeptin C4 (8 µg/ml). Values  
662 represented as mean±SD (n=4). Values above bars (A-L) indicate amino acid change in induced  
663 resistant isolate. Δ represents a complete deletion of protein and \* is a stop codon.

664

665

666

667

668

669

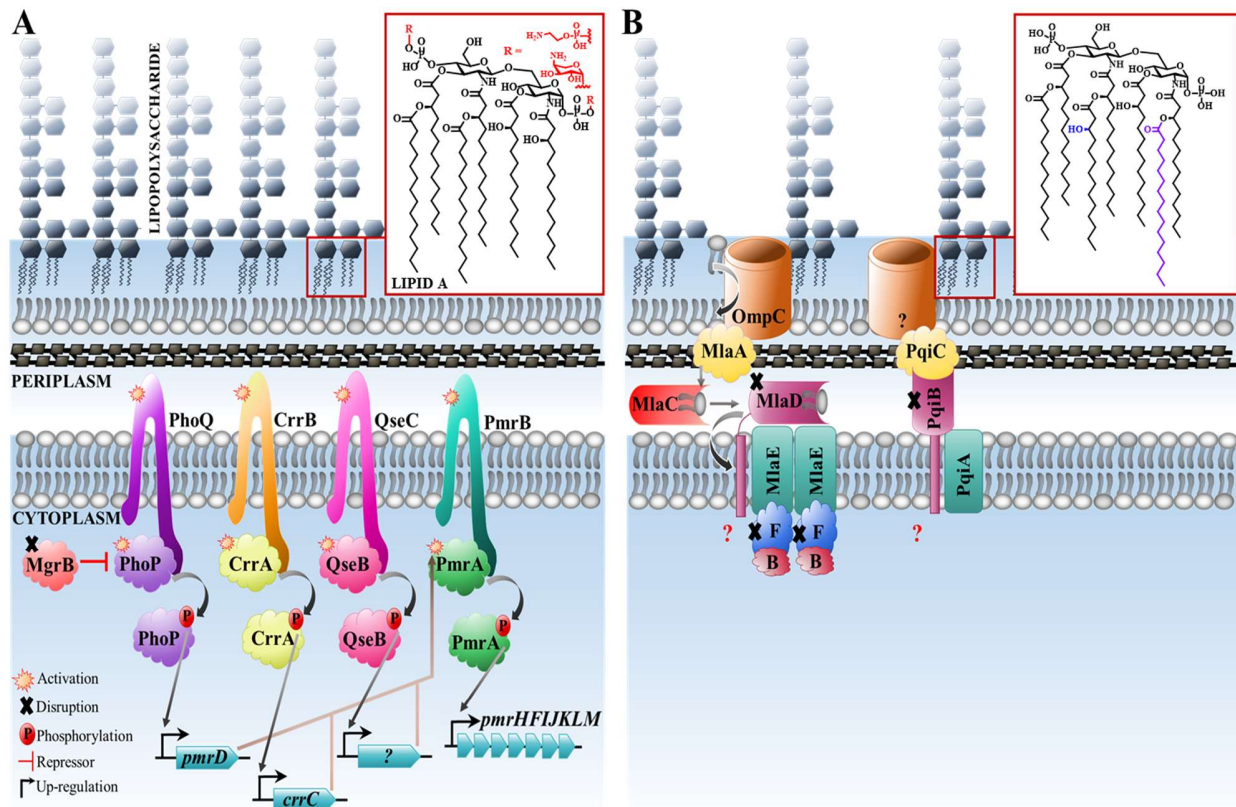

670

671 **FIG 5** Proposed pathway associated with *K. pneumoniae* polymyxin and octapeptin C4 resistance  
 672 observed in this study. (A) To facilitate resistance against polymyxins, genomic variations are  
 673 acquired in two-component regulatory systems. These encompass CrrAB, QseBC, PmrAB and  
 674 PhoPQ with MgrB acting as a negative repressor. Once this pathway is activated during resistance,  
 675 sensor histidine kinases (CrrB, QseC, PmrB, PhoQ) will phosphorylate response regulators (CrrA,  
 676 QseB, PmrA, PhoP) and allow for the expression of target genes (*crrC*, unknown (?), *pmrD*,  
 677 *pmrHFIJKLM*). Disruptions in MgrB allow for the up-regulation of this pathway resulting in the  
 678 expression of *pmrHFIJKLM* which allows for 4-amino-4-deoxy-arabinose or  
 679 phosphoethanolamine to be attached to phosphate groups on lipid A. (B) The major disruptions  
 680 identified during octapeptin C4 resistance was in the Mla and Pqi pathway. OmpC removes

681 phospholipids (PLs) from the outer member and transfers these to MlaA. PLs are transported  
682 across the periplasm via MlaC and transported to the MlaBDEF complex where the subsequent  
683 fate of PLs is unknown. An unknown porin complexes with PqiC to transport metabolites and  
684 potentially PLs across the periplasm via the PqiAB complex. Perturbations in these pathways  
685 elevated the MIC towards octapeptin C4 and subsequent hydroxymyristae and palmitoylation of  
686 lipid A to potentially stabilise the outer membrane.

687 **TABLE 1** Minimum inhibitory concentrations of day 20 replicates compared to initial isolate across several antibiotic classes

688

| Strain <sup>a</sup> | Minimum inhibitory concentration (µg/ml) <sup>b</sup> |                     |       |                    |                    |                      |                    |                      |                    |                    |                      |                    |                      |                      |                    |
|---------------------|-------------------------------------------------------|---------------------|-------|--------------------|--------------------|----------------------|--------------------|----------------------|--------------------|--------------------|----------------------|--------------------|----------------------|----------------------|--------------------|
|                     | CST                                                   | PMB                 | OctC4 | AMX                | ATM                | FEP                  | CRO                | CHL                  | CIP                | GEN                | MEM                  | PIP                | TET                  | TGC                  | TMP                |
| <b>Initial</b>      | ≤0.25 <sup>S</sup>                                    | ≤0.125 <sup>S</sup> | 8.00  | >64.0 <sup>R</sup> | >64.0 <sup>R</sup> | ≥16.0 <sup>R</sup>   | >64.0 <sup>R</sup> | ≥32.0 <sup>R</sup>   | >64.0 <sup>R</sup> | ≤4.00 <sup>S</sup> | ≥32.0 <sup>R</sup>   | >64.0 <sup>I</sup> | >64.0 <sup>R</sup>   | ≤2.00 <sup>S,I</sup> | >64.0 <sup>R</sup> |
| <b>CST_1</b>        | >128 <sup>R</sup>                                     | >128 <sup>R</sup>   | ≤8.00 | >64.0 <sup>R</sup> | >64.0 <sup>R</sup> | ≥16.0 <sup>R</sup>   | >64.0 <sup>R</sup> | ≤8.00 <sup>S</sup>   | ≥32.0 <sup>R</sup> | 4.00 <sup>S</sup>  | ≥32.0 <sup>R</sup>   | >64.0 <sup>I</sup> | >64.0 <sup>R</sup>   | ≤4.00 <sup>S,R</sup> | >64.0 <sup>R</sup> |
| <b>CST_2</b>        | >128 <sup>R</sup>                                     | >128 <sup>R</sup>   | ≤4.00 | >64.0 <sup>R</sup> | >64.0 <sup>R</sup> | >64.0 <sup>R</sup>   | >64.0 <sup>R</sup> | 4.00 <sup>S</sup>    | ≥32.0 <sup>R</sup> | ≤4.00 <sup>S</sup> | ≥32.0 <sup>R</sup>   | >64.0 <sup>I</sup> | >64.0 <sup>R</sup>   | 2.00 <sup>I</sup>    | >64.0 <sup>R</sup> |
| <b>CST_3</b>        | ≥128 <sup>R</sup>                                     | ≥128 <sup>R</sup>   | ≤4.00 | >64.0 <sup>R</sup> | >64.0 <sup>R</sup> | >64.0 <sup>R</sup>   | >64.0 <sup>R</sup> | 8.00 <sup>S</sup>    | >64.0 <sup>R</sup> | ≤4.00 <sup>S</sup> | >64.0 <sup>R</sup>   | >64.0 <sup>I</sup> | >64.0 <sup>R</sup>   | ≤4.00 <sup>I,R</sup> | >64.0 <sup>R</sup> |
| <b>CST_4</b>        | >128 <sup>R</sup>                                     | >128 <sup>R</sup>   | ≤8.00 | >64.0 <sup>R</sup> | >64.0 <sup>R</sup> | >64.0 <sup>R</sup>   | >64.0 <sup>R</sup> | ≤8.00 <sup>S</sup>   | >64.0 <sup>R</sup> | ≤4.00 <sup>S</sup> | >64.0 <sup>R</sup>   | >64.0 <sup>I</sup> | >64.0 <sup>R</sup>   | ≤4.00 <sup>I,R</sup> | >64.0 <sup>R</sup> |
| <b>CST_5</b>        | >128 <sup>R</sup>                                     | >128 <sup>R</sup>   | 2.00  | >64.0 <sup>R</sup> | >64.0 <sup>R</sup> | >64.0 <sup>R</sup>   | >64.0 <sup>R</sup> | ≤8.00 <sup>S</sup>   | >64.0 <sup>R</sup> | ≤4.00 <sup>S</sup> | >64.0 <sup>R</sup>   | >64.0 <sup>I</sup> | >64.0 <sup>R</sup>   | ≤4.00 <sup>I,R</sup> | >64.0 <sup>R</sup> |
| <b>CST_6</b>        | >128 <sup>R</sup>                                     | >128 <sup>R</sup>   | ≤8.00 | >64.0 <sup>R</sup> | >64.0 <sup>R</sup> | >64.0 <sup>R</sup>   | >64.0 <sup>R</sup> | 8.00 <sup>S</sup>    | >64.0 <sup>R</sup> | ≤4.00 <sup>S</sup> | >64.0 <sup>R</sup>   | >64.0 <sup>I</sup> | >64.0 <sup>R</sup>   | ≥4.00 <sup>R</sup>   | >64.0 <sup>R</sup> |
| <b>PMB_1</b>        | 128 <sup>R</sup>                                      | 128 <sup>R</sup>    | ≤4.00 | >64.0 <sup>R</sup> | >64.0 <sup>R</sup> | >64.0 <sup>R</sup>   | 32.0 <sup>R</sup>  | 4.00 <sup>S</sup>    | 32.0 <sup>R</sup>  | ≤4.00 <sup>S</sup> | >64.0 <sup>R</sup>   | >64.0 <sup>I</sup> | >64.0 <sup>R</sup>   | ≤4.00 <sup>I,R</sup> | >64.0 <sup>R</sup> |
| <b>PMB_2</b>        | >128 <sup>R</sup>                                     | >128 <sup>R</sup>   | 8.00  | >64.0 <sup>R</sup> | >64.0 <sup>R</sup> | ≤8.00 <sup>I</sup>   | >64.0 <sup>R</sup> | 4.00 <sup>S</sup>    | >64.0 <sup>R</sup> | ≤4.00 <sup>S</sup> | ≤0.25 <sup>S</sup>   | >64.0 <sup>I</sup> | >64.0 <sup>R</sup>   | ≤2.00 <sup>S,I</sup> | >64.0 <sup>R</sup> |
| <b>PMB_3</b>        | >128 <sup>R</sup>                                     | >128 <sup>R</sup>   | 4.00  | >64.0 <sup>R</sup> | >64.0 <sup>R</sup> | ≥32.0 <sup>R</sup>   | >64.0 <sup>R</sup> | 8.00 <sup>S</sup>    | >64.0 <sup>R</sup> | 2.00 <sup>S</sup>  | ≥32.0 <sup>R</sup>   | >64.0 <sup>I</sup> | >64.0 <sup>R</sup>   | 2.00 <sup>I</sup>    | >64.0 <sup>R</sup> |
| <b>PMB_4</b>        | >128 <sup>R</sup>                                     | >128 <sup>R</sup>   | 4.00  | >64.0 <sup>R</sup> | >64.0 <sup>R</sup> | ≥8.00 <sup>I,R</sup> | ≥32.0 <sup>R</sup> | ≤2.00 <sup>S</sup>   | 48.00 <sup>R</sup> | 2.00 <sup>S</sup>  | ≥8.00 <sup>R</sup>   | >64.0 <sup>I</sup> | >64.0 <sup>R</sup>   | 2.00 <sup>I</sup>    | >64.0 <sup>R</sup> |
| <b>PMB_5</b>        | >128 <sup>R</sup>                                     | >128 <sup>R</sup>   | ≤8.00 | >64.0 <sup>R</sup> | >64.0 <sup>R</sup> | ≥8.00 <sup>I,R</sup> | ≥32.0 <sup>R</sup> | ≤8.00 <sup>S</sup>   | >64.0 <sup>R</sup> | ≤4.00 <sup>S</sup> | ≥2.00 <sup>I,R</sup> | >64.0 <sup>I</sup> | >64.0 <sup>R</sup>   | ≤2.00 <sup>S,I</sup> | >64.0 <sup>R</sup> |
| <b>PMB_6</b>        | >128 <sup>R</sup>                                     | >128 <sup>R</sup>   | ≤8.00 | >64.0 <sup>R</sup> | >64.0 <sup>R</sup> | ≥16.0 <sup>R</sup>   | >64.0 <sup>R</sup> | 8.00 <sup>S</sup>    | >64.0 <sup>R</sup> | ≤4.00 <sup>S</sup> | ≥32.0 <sup>R</sup>   | >64.0 <sup>I</sup> | >64.0 <sup>R</sup>   | ≤4.00 <sup>I,R</sup> | >64.0 <sup>R</sup> |
| <b>OctC4_1</b>      | 0.25 <sup>S</sup>                                     | ≤0.25 <sup>S</sup>  | 32.0  | >64.0 <sup>R</sup> | >64.0 <sup>R</sup> | ≥16.0 <sup>R</sup>   | >64.0 <sup>R</sup> | 8.00 <sup>S</sup>    | >64.0 <sup>R</sup> | ≤2.00 <sup>S</sup> | ≥32.0 <sup>R</sup>   | >64.0 <sup>I</sup> | >64.0 <sup>R</sup>   | ≤2.00 <sup>S,I</sup> | >64.0 <sup>R</sup> |
| <b>OctC4_2</b>      | 0.25 <sup>S</sup>                                     | 0.25 <sup>S</sup>   | 32.0  | >64.0 <sup>R</sup> | >64.0 <sup>R</sup> | ≥8.00 <sup>I,R</sup> | >64.0 <sup>R</sup> | 8.00 <sup>S</sup>    | >64.0 <sup>R</sup> | ≤2.00 <sup>S</sup> | ≥32.0 <sup>R</sup>   | >64.0 <sup>I</sup> | ≤2.00 <sup>S</sup>   | ≤1.00 <sup>S</sup>   | ≥8.00 <sup>R</sup> |
| <b>OctC4_3</b>      | ≤0.5 <sup>S</sup>                                     | 0.25 <sup>S</sup>   | 32.0  | >64.0 <sup>R</sup> | >64.0 <sup>R</sup> | ≤4.00 <sup>S,I</sup> | 32.0 <sup>R</sup>  | 8.00 <sup>S</sup>    | >64.0 <sup>R</sup> | ≤4.00 <sup>S</sup> | ≤0.25 <sup>S</sup>   | >64.0 <sup>I</sup> | >64.0 <sup>R</sup>   | 2.00 <sup>I</sup>    | >64.0 <sup>R</sup> |
| <b>OctC4_4</b>      | ≤0.5 <sup>S</sup>                                     | 0.25 <sup>S</sup>   | >32.0 | >64.0 <sup>R</sup> | >64.0 <sup>R</sup> | ≤4.00 <sup>S,I</sup> | 32.0 <sup>R</sup>  | 8.00 <sup>S</sup>    | >64.0 <sup>R</sup> | 1.00 <sup>S</sup>  | ≤0.25 <sup>S</sup>   | >64.0 <sup>I</sup> | ≥2.00 <sup>S,R</sup> | ≤2.00 <sup>S,I</sup> | ≥4.00 <sup>R</sup> |
| <b>OctC4_5</b>      | 0.50 <sup>S</sup>                                     | 0.50 <sup>S</sup>   | 32.0  | >64.0 <sup>R</sup> | >64.0 <sup>R</sup> | >64.0 <sup>R</sup>   | >64.0 <sup>R</sup> | ≤8.00 <sup>S</sup>   | >64.0 <sup>R</sup> | 2.00 <sup>S</sup>  | >64.0 <sup>R</sup>   | >64.0 <sup>I</sup> | >64.0 <sup>R</sup>   | 2.00 <sup>I</sup>    | >64.0 <sup>R</sup> |
| <b>OctC4_6</b>      | ≤0.5 <sup>S</sup>                                     | ≤0.5 <sup>S</sup>   | 32.0  | >64.0 <sup>R</sup> | >64.0 <sup>R</sup> | ≤4.00 <sup>S,I</sup> | ≥32.0 <sup>R</sup> | ≤16.0 <sup>S,I</sup> | >64.0 <sup>R</sup> | 2.00 <sup>S</sup>  | ≤0.25 <sup>S</sup>   | >64.0 <sup>I</sup> | >64.0 <sup>R</sup>   | 2.00 <sup>I</sup>    | >64.0 <sup>R</sup> |

689

690 <sup>a</sup>Initial polymyxin-susceptible isolate is 20\_GR\_12 compared against 20 days of treatment against polymyxin B (PMB), colistin (CST)  
691 or Octapeptin C4 (OctC4).

692 <sup>b</sup>Minimum Inhibitory Concentration tested for CST, Colistin; PMB, polymyxin B; OctC4, Octapeptin C4; AMX, Amoxicillin; ATM,  
693 Aztreonam; FEP, Cefepime; CRO, Ceftriaxone; CHL, Chloramphenicol; CIP, Ciprofloxacin; GEN, Gentamicin; MEM, Meropenem;  
694 PIP, Piperacillin; TET, Tetracycline; TGC, Tigecycline; TMP, Trimethoprim. Resistance determined as per CLSI guidelines and  
695 EUCAST for tigecycline with: **S**, Susceptible; **I**, Intermediate; **R**, Resistant. Fluctuations in MIC values (n=4) are displayed by two letters  
696 defining the resistance level. Resistance for Octapeptin C4 defined as  $\geq 32$   $\mu\text{g/ml}$ .

697 **TABLE 2** Detection of acquired resistance genes and plasmid replicons compared to the initial isolate and treatment groups

698

699

700

701

702

703

704

705

706

707

| Strain <sup>a</sup> | Antibiotic class impacted <sup>b</sup> |                   |                    |                  |                 |                 |                  |                 |                  |                  |                  |             |                     |             | Plasmids <sup>c</sup> |             |               |               |   |   |   |   |   |
|---------------------|----------------------------------------|-------------------|--------------------|------------------|-----------------|-----------------|------------------|-----------------|------------------|------------------|------------------|-------------|---------------------|-------------|-----------------------|-------------|---------------|---------------|---|---|---|---|---|
|                     | A                                      |                   |                    |                  | B               |                 |                  |                 | F                | Q                | S                | T           | Tr                  | I           | II                    | III         | IV            | V             |   |   |   |   |   |
|                     | <i>aac(6')-Ib</i>                      | <i>aph(3')-Ia</i> | <i>aph(3'')-Ib</i> | <i>aph(6)-Id</i> | <i>blaKPC-2</i> | <i>blaKPC-9</i> | <i>blaLEN-12</i> | <i>blaOXA-9</i> | <i>blaSHV-12</i> | <i>blaTEM-1A</i> | <i>blaTEM-1B</i> | <i>fosA</i> | <i>aac(6)-Ib-cr</i> | <i>oqxA</i> | <i>oqxB</i>           | <i>sul2</i> | <i>tet(A)</i> | <i>dfrA14</i> |   |   |   |   |   |
| 20 GR 12            | 2                                      | 2                 | 2                  | 2                | 2               |                 | 2                | 2               |                  | 2                | 2                | 2           | 2                   | 2           | 2                     | 2           | 2             | 2             | 2 | 2 | 2 | 2 | 2 |
| CST_1               | 4                                      | 4                 | 4                  | 4                | 4               |                 | 4                | 4               |                  | 1                | 3                | 4           | 4                   | 4           | 4                     | 4           | 4             | 4             | 4 | 4 | 4 | 4 | 4 |
| CST_2               | 4                                      | 4                 | 4                  | 4                | 4               |                 | 4                | 4               |                  |                  | 4                | 4           | 4                   | 4           | 4                     | 4           | 4             | 4             | 4 | 4 | 4 | 4 | 4 |
| CST_3               | 4                                      | 4                 | 4                  | 4                | 4               |                 | 4                | 4               |                  |                  | 4                | 4           | 4                   | 4           | 4                     | 4           | 4             | 4             | 4 | 4 | 4 | 4 | 4 |
| CST_4               | 4                                      | 4                 | 4                  | 4                | 4               |                 | 4                | 4               |                  |                  | 4                | 4           | 4                   | 4           | 4                     | 4           | 4             | 4             | 4 | 4 | 4 | 4 | 4 |
| PMB_1               | 4                                      | 4                 | 4                  | 4                | 4               |                 | 4                | 4               |                  | 1                | 3                | 4           | 4                   | 4           | 4                     | 4           | 4             | 4             | 4 | 4 | 4 | 4 | 4 |
| PMB_2               | 4                                      |                   | 4                  | 4                |                 |                 | 4                |                 |                  |                  | 4                | 4           | 4                   | 4           | 4                     | 4           | 4             | 4             | 4 | 4 | 4 | 4 |   |
| PMB_3               | 4                                      | 3                 | 4                  | 4                | 3               |                 | 3                | 3               | 1                |                  | 4                | 4           | 4                   | 4           | 4                     | 4           | 4             | 4             | 4 | 4 | 4 | 4 | 3 |
| PMB_4               | 4                                      | 4                 | 4                  | 4                | 4               |                 | 4                | 4               |                  | 1                | 3                | 4           | 4                   | 4           | 4                     | 4           | 4             | 4             | 4 | 4 | 4 | 4 | 4 |
| OctC4_1             | 4                                      | 4                 | 4                  | 4                | 1               |                 | 3                | 4               | 1                |                  | 4                | 4           | 4                   | 4           | 4                     | 4           | 4             | 4             | 4 | 4 | 4 | 4 | 4 |
| OctC4_2             | 4                                      | 4                 |                    |                  | 3               |                 | 4                | 4               |                  | 4                |                  | 4           | 4                   | 4           | 4                     |             |               |               |   | 4 | 4 | 4 | 4 |
| OctC4_3             | 4                                      | 4                 | 2                  | 2                |                 | 4               | 3                | 4               | 1                | 2                | 2                | 4           | 4                   | 4           | 4                     | 2           | 2             | 2             | 4 | 4 | 4 | 2 | 4 |
| OctC4_4             | 4                                      |                   | 1                  | 1                |                 |                 | 4                |                 |                  |                  | 1                | 4           | 4                   | 4           | 4                     | 1           | 1             | 1             | 4 |   |   | 1 | 4 |

708 <sup>a</sup>Strain represents initial isolate (20\_GR\_12) and this strain subjected to 20 days of treatment with either colistin, CST; polymyxin B,  
709 PMB; Octapeptin C4 and \_replicate number.

710 <sup>b</sup>Acquired resistance genes as determined by ResFinder 2.1 ( $\geq 90\%$  identity and  $\geq 60\%$  length) for A, Aminoglycoside; B, Beta-Lactam;  
711 F, Fosfomycin; Q, Quinolone; S, Sulfonamide; T, Tetracycline; Tr, Trimethoprim.

712 <sup>c</sup>Plasmid replicons detected by PlasmidFinder 1.3 ( $\geq 95\%$  identity). Plasmid numbers represent I, ColRNAI; II, IncFIB(K)-Kpn3; III,  
713 IncFII(K); IV, IncN; V, IncX3.

714 Shading represents the presence of the gene or plasmid and the number indicates the colonies harboring this attribute.

715 **TABLE 3** Genomic alterations detected in day 20 resistance induced isolates

716

| Strain <sup>a</sup>  | Gene          | Gene description                                       | Nucleotide change <sup>b</sup>        | Amino acid change <sup>c</sup> |
|----------------------|---------------|--------------------------------------------------------|---------------------------------------|--------------------------------|
| CST_1(4)             | <i>crrB</i>   | Two-component hybrid sensor and regulator              | A170T                                 | D57V                           |
| CST_2(4)             | <i>hepIII</i> | Lipopolysaccharide heptosyltransferase III             | A238Δ <sup>fs</sup>                   | R80G <sup>tr</sup>             |
| CST_2(4)             | <i>mgrB</i>   | Putative inner membrane protein                        | 1-144Δ                                | 1-47Δ                          |
| CST_3(4)             | <i>mgrB</i>   | Putative inner membrane protein                        | G3A                                   | M1I                            |
| CST_3(4)             | <i>phoQ</i>   | Sensor protein                                         | C1258G, G1300T                        | P420A, G434C                   |
| CST_4(3)             | <i>epsJ</i>   | Glycosyltransferase                                    | T932G                                 | L310STOP                       |
| CST_4(3)             | <i>lptC</i>   | Lipopolysaccharide export system protein               | Δ498A <sup>fs</sup>                   | N166K <sup>tr</sup>            |
| CST_4(4)             | <i>mgrB</i>   | Putative inner membrane protein                        | G-41T, A125T                          | N42I                           |
| CST_4(4)             | <i>phoQ</i>   | Sensor protein                                         | G1249A                                | D417N                          |
| PMB_1(4)             | <i>pmrB</i>   | Sensor protein                                         | C284T                                 | P95L                           |
| PMB_2(4)             | <i>dnaJ</i>   | Chaperone protein                                      | A892C                                 | T298P                          |
| PMB_2(4)             | <i>mgrB</i>   | Putative inner membrane protein                        | G140T                                 | W47L                           |
| PMB_2(4)             | <i>phoP</i>   | Transcriptional regulatory protein                     | C241T                                 | R81C                           |
| PMB_2(4)             | <i>hepIII</i> | Lipopolysaccharide heptosyltransferase III             | TGAAGAGACCCG153Δ                      | Y51STOP                        |
| PMB_3(4)             | <i>qseC</i>   | Sensory histidine kinase                               | GCCTGAGCCTGC17Δ <sup>fs</sup> , A847C | S8R, I283L                     |
| PMB_4(4)             | <i>mgrB</i>   | Putative inner membrane protein                        | G85T                                  | D29Y                           |
| PMB_4(4)             | <i>qseC</i>   | Sensory histidine kinase                               | CTGGATAAGCTG118Δ <sup>fs</sup>        | L40F                           |
| PMB_4(4)             | <i>yciM</i>   | Lipopolysaccharide regulatory protein                  | T128G                                 | V43G                           |
| OctC4_1(4)           | <i>mlaD</i>   | Uncharacterized ABC transporter, periplasmic component | C403T                                 | Q135STOP                       |
| OctC4_1(4)           | <i>pqiB</i>   | Paraquat-inducible protein B                           | C1258T                                | Q420STOP                       |
| OctC4_1(4)           | <i>traH</i>   | Conjugal transfer protein                              | G417T                                 | M139I                          |
| OctC4_2(4)           | <i>pqiB</i>   | Paraquat-inducible protein B                           | A2080C                                | T694P                          |
| OctC4_2(2)           | <i>rpsA</i>   | SSU ribosomal protein S1p                              | T1031A                                | L344Q                          |
| OctC4_3(2)           | <i>hinT</i>   | YcfF/hinT protein: purine nucleoside phosphoramidase   | Δ240C <sup>fs</sup>                   | D81R <sup>tr</sup>             |
| OctC4_4(2)           | <i>azoR</i>   | FMN-dependent NADH-azoreductase                        | T152A                                 | L51Q                           |
| OctC4_2(4),3(4),4(4) | <i>mfaF</i>   | Uncharacterized ABC transporter, ATP-binding protein   | GCCGC493Δ <sup>fs</sup>               | A165P <sup>tr</sup>            |



717 <sup>a</sup>Strain represented as treatment group (Colistin, CST; Polymyxin B, PMB; Octapeptin C4,  
718 OctC4), \_ replicate number and number of colonies impacted from the 4 selected.

719 <sup>b</sup>Nucleotide variations present in  $\geq 90$  % of reads and  $\geq 50$  X coverage compared to initial strain,  
720 20\_GR\_12.  $\Delta$  symbolises a deletion, – in front of the nucleotide position indicates an alteration  
721 upstream and <sup>fs</sup> represents a frameshift mutation.

722 <sup>c</sup>The introduction of a truncation in the protein downstream of the alteration is noted as <sup>tr</sup>.
